# Supplementary material
Source: Springer Nature journal article supplement (https://www.springermedizin.de/resource/supplementary/12955_2007_412_MOESM2_ESM.pdf/9560338)

Factor 2: Independence from glasses (6%)

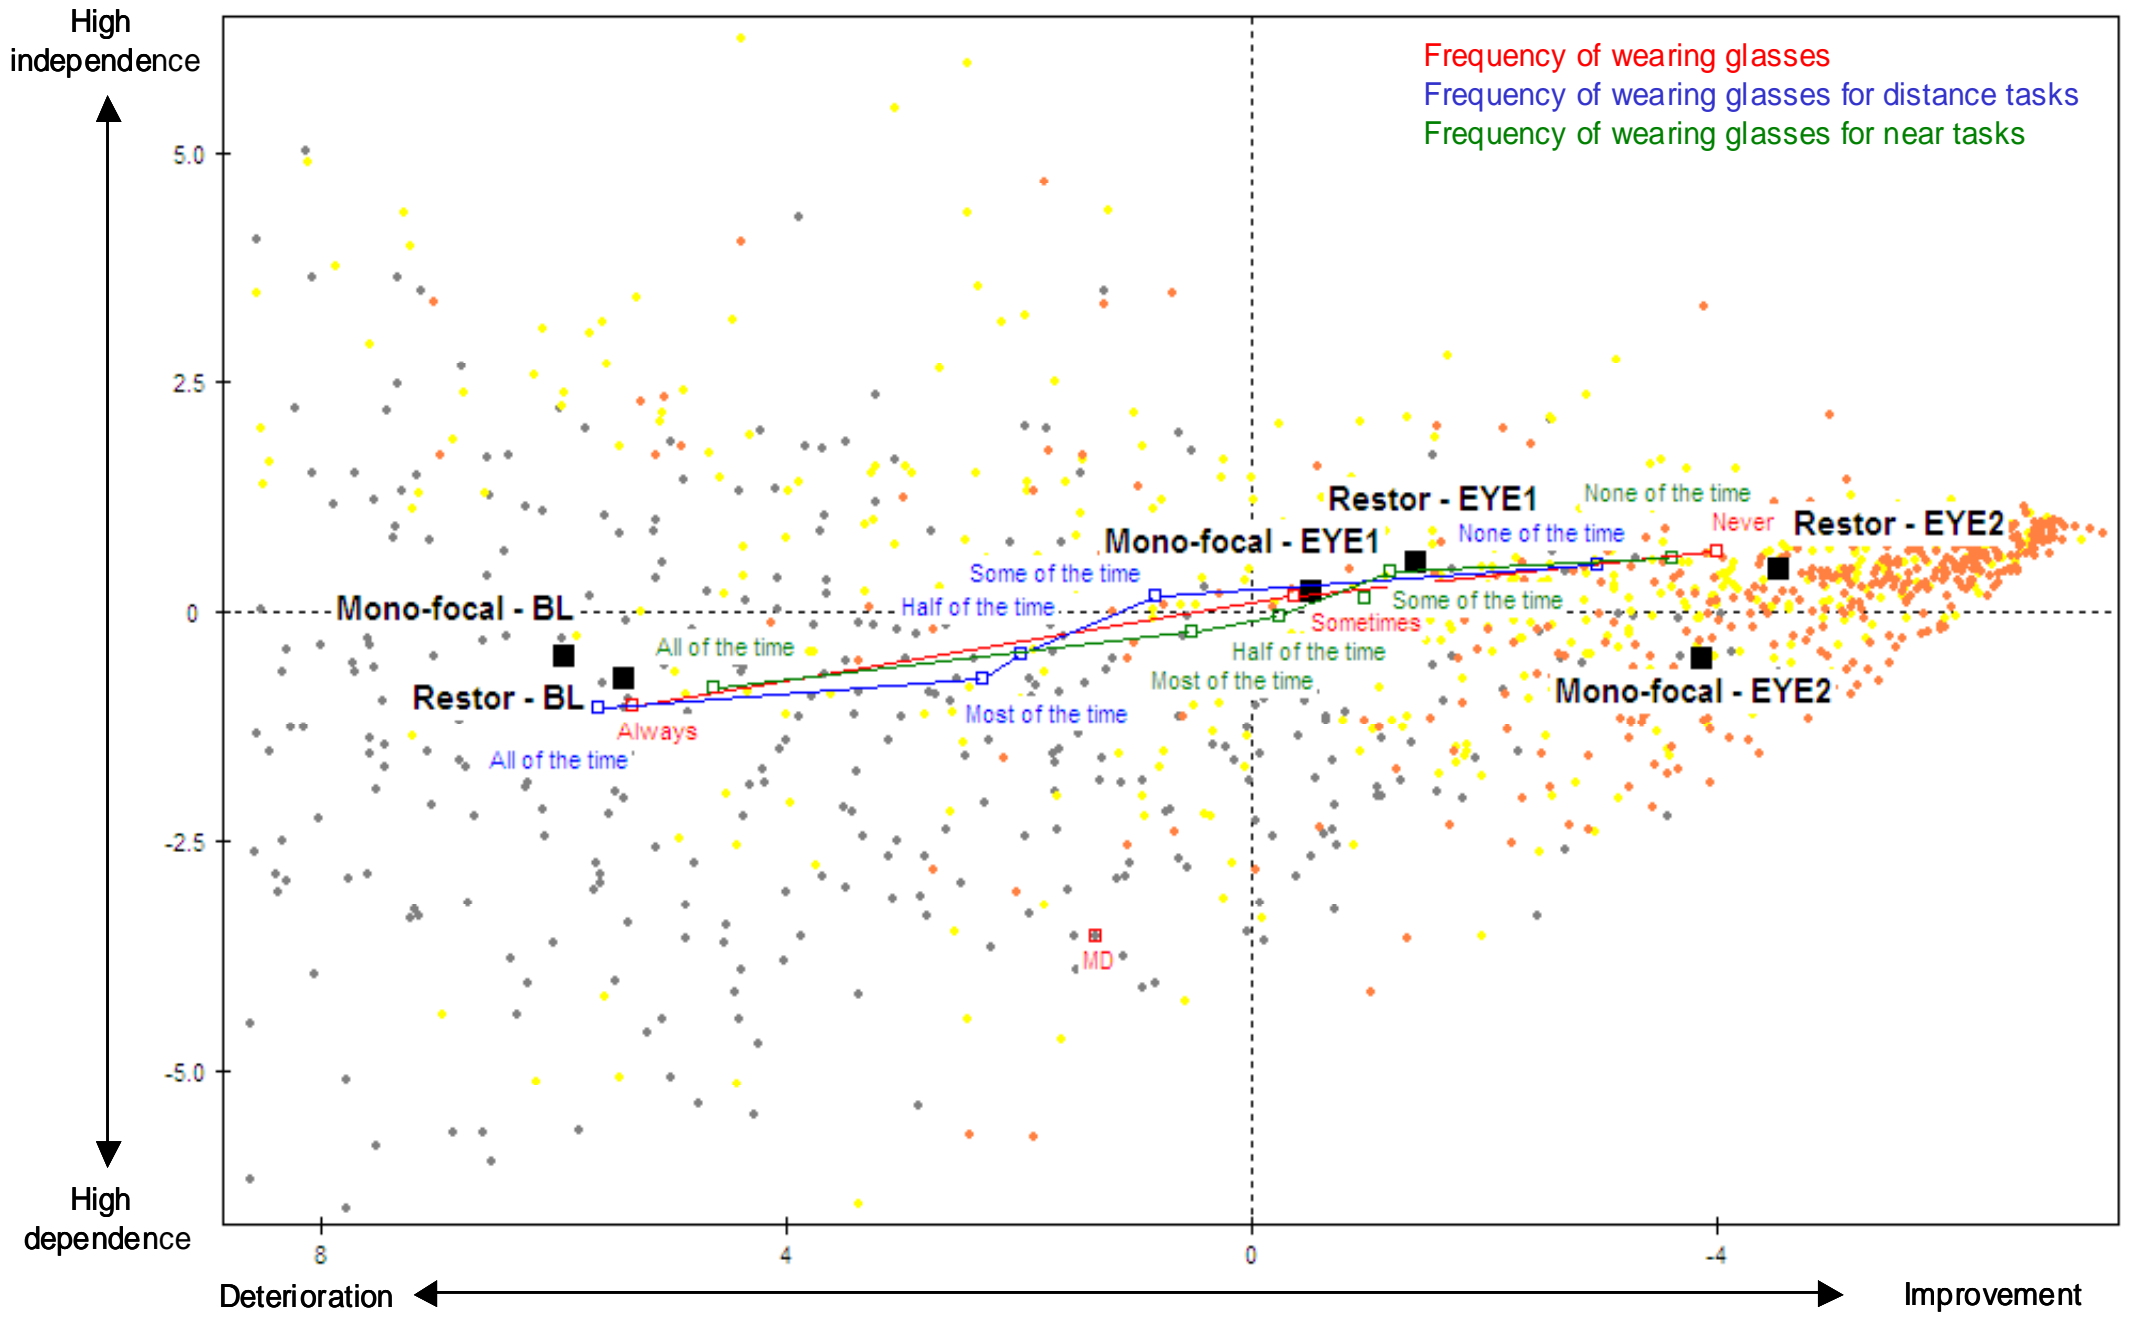

Factor 1: Visual functioning and patient satisfaction (55%)

Supplement: MOESM2 [file 9560338]
